# Supplementary figures and images for: STAR Chimeric Post for rapid detection of circular RNA and fusion transcripts
Source: Oxford University Press journal article supplement (doi:10.1093/bioinformatics/bty091), 2018-02-16

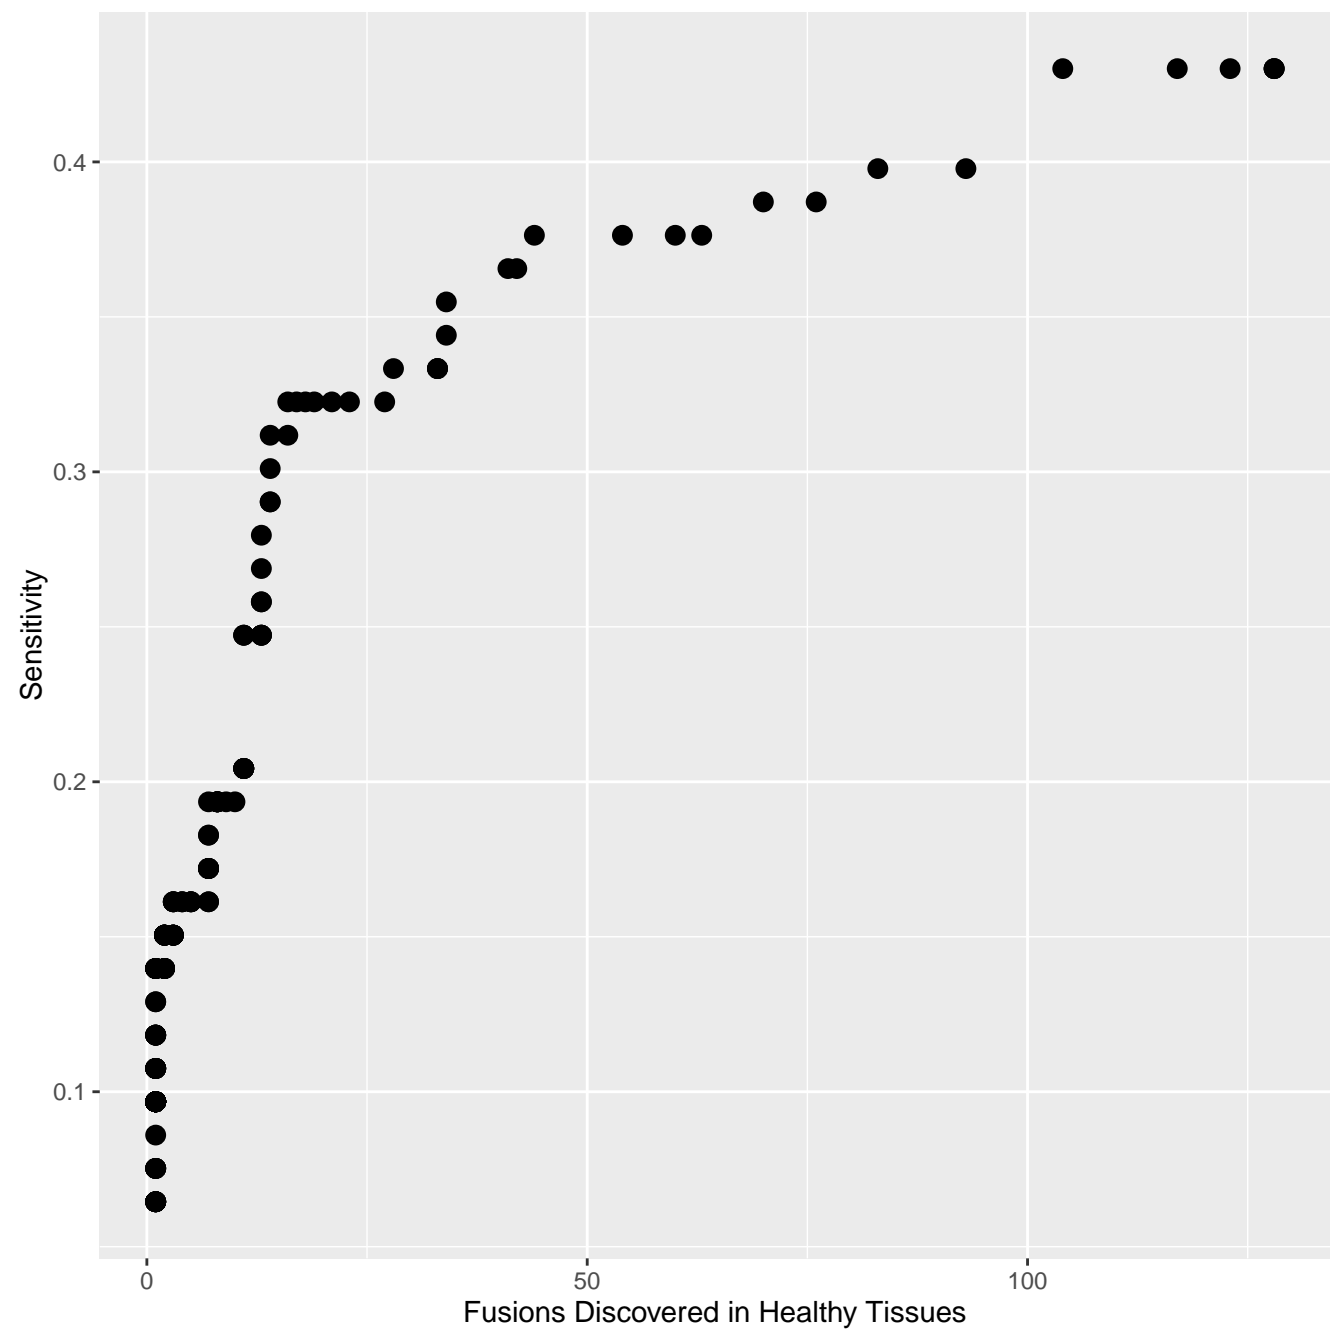

Supplement: bioinformatics_34_14_2364_s5.zip [file bioinformatics_34_14_2364_s5.zip]

**A.**

TCGA

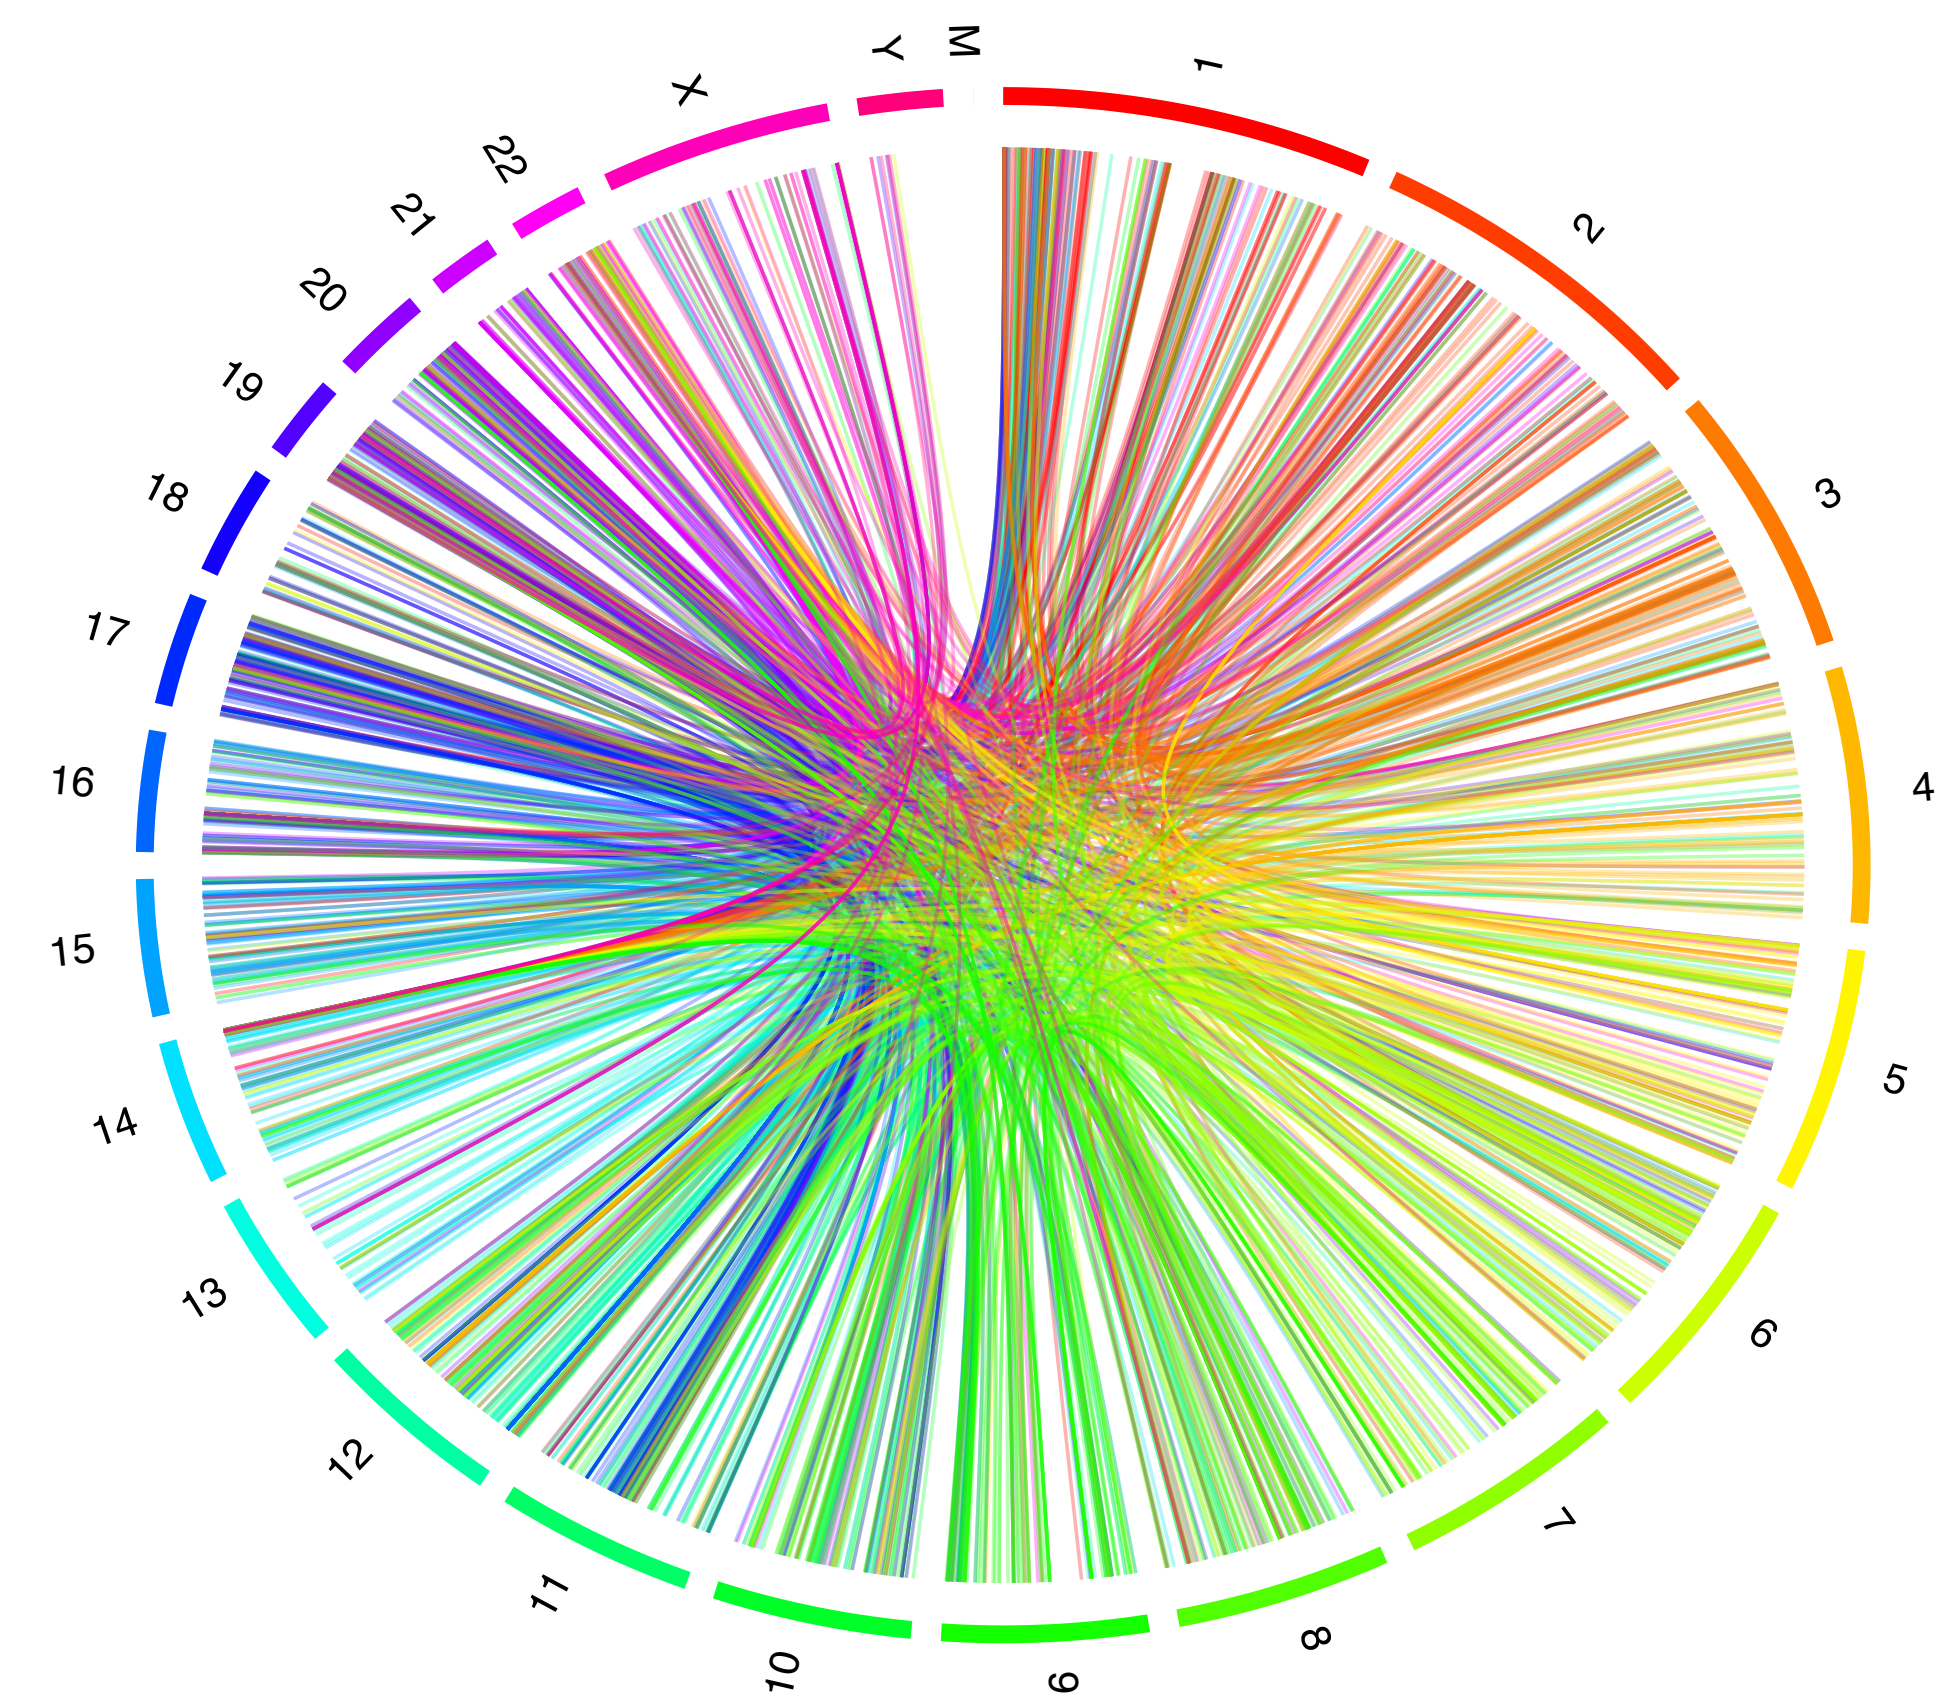**B.**

TCGA BRCA

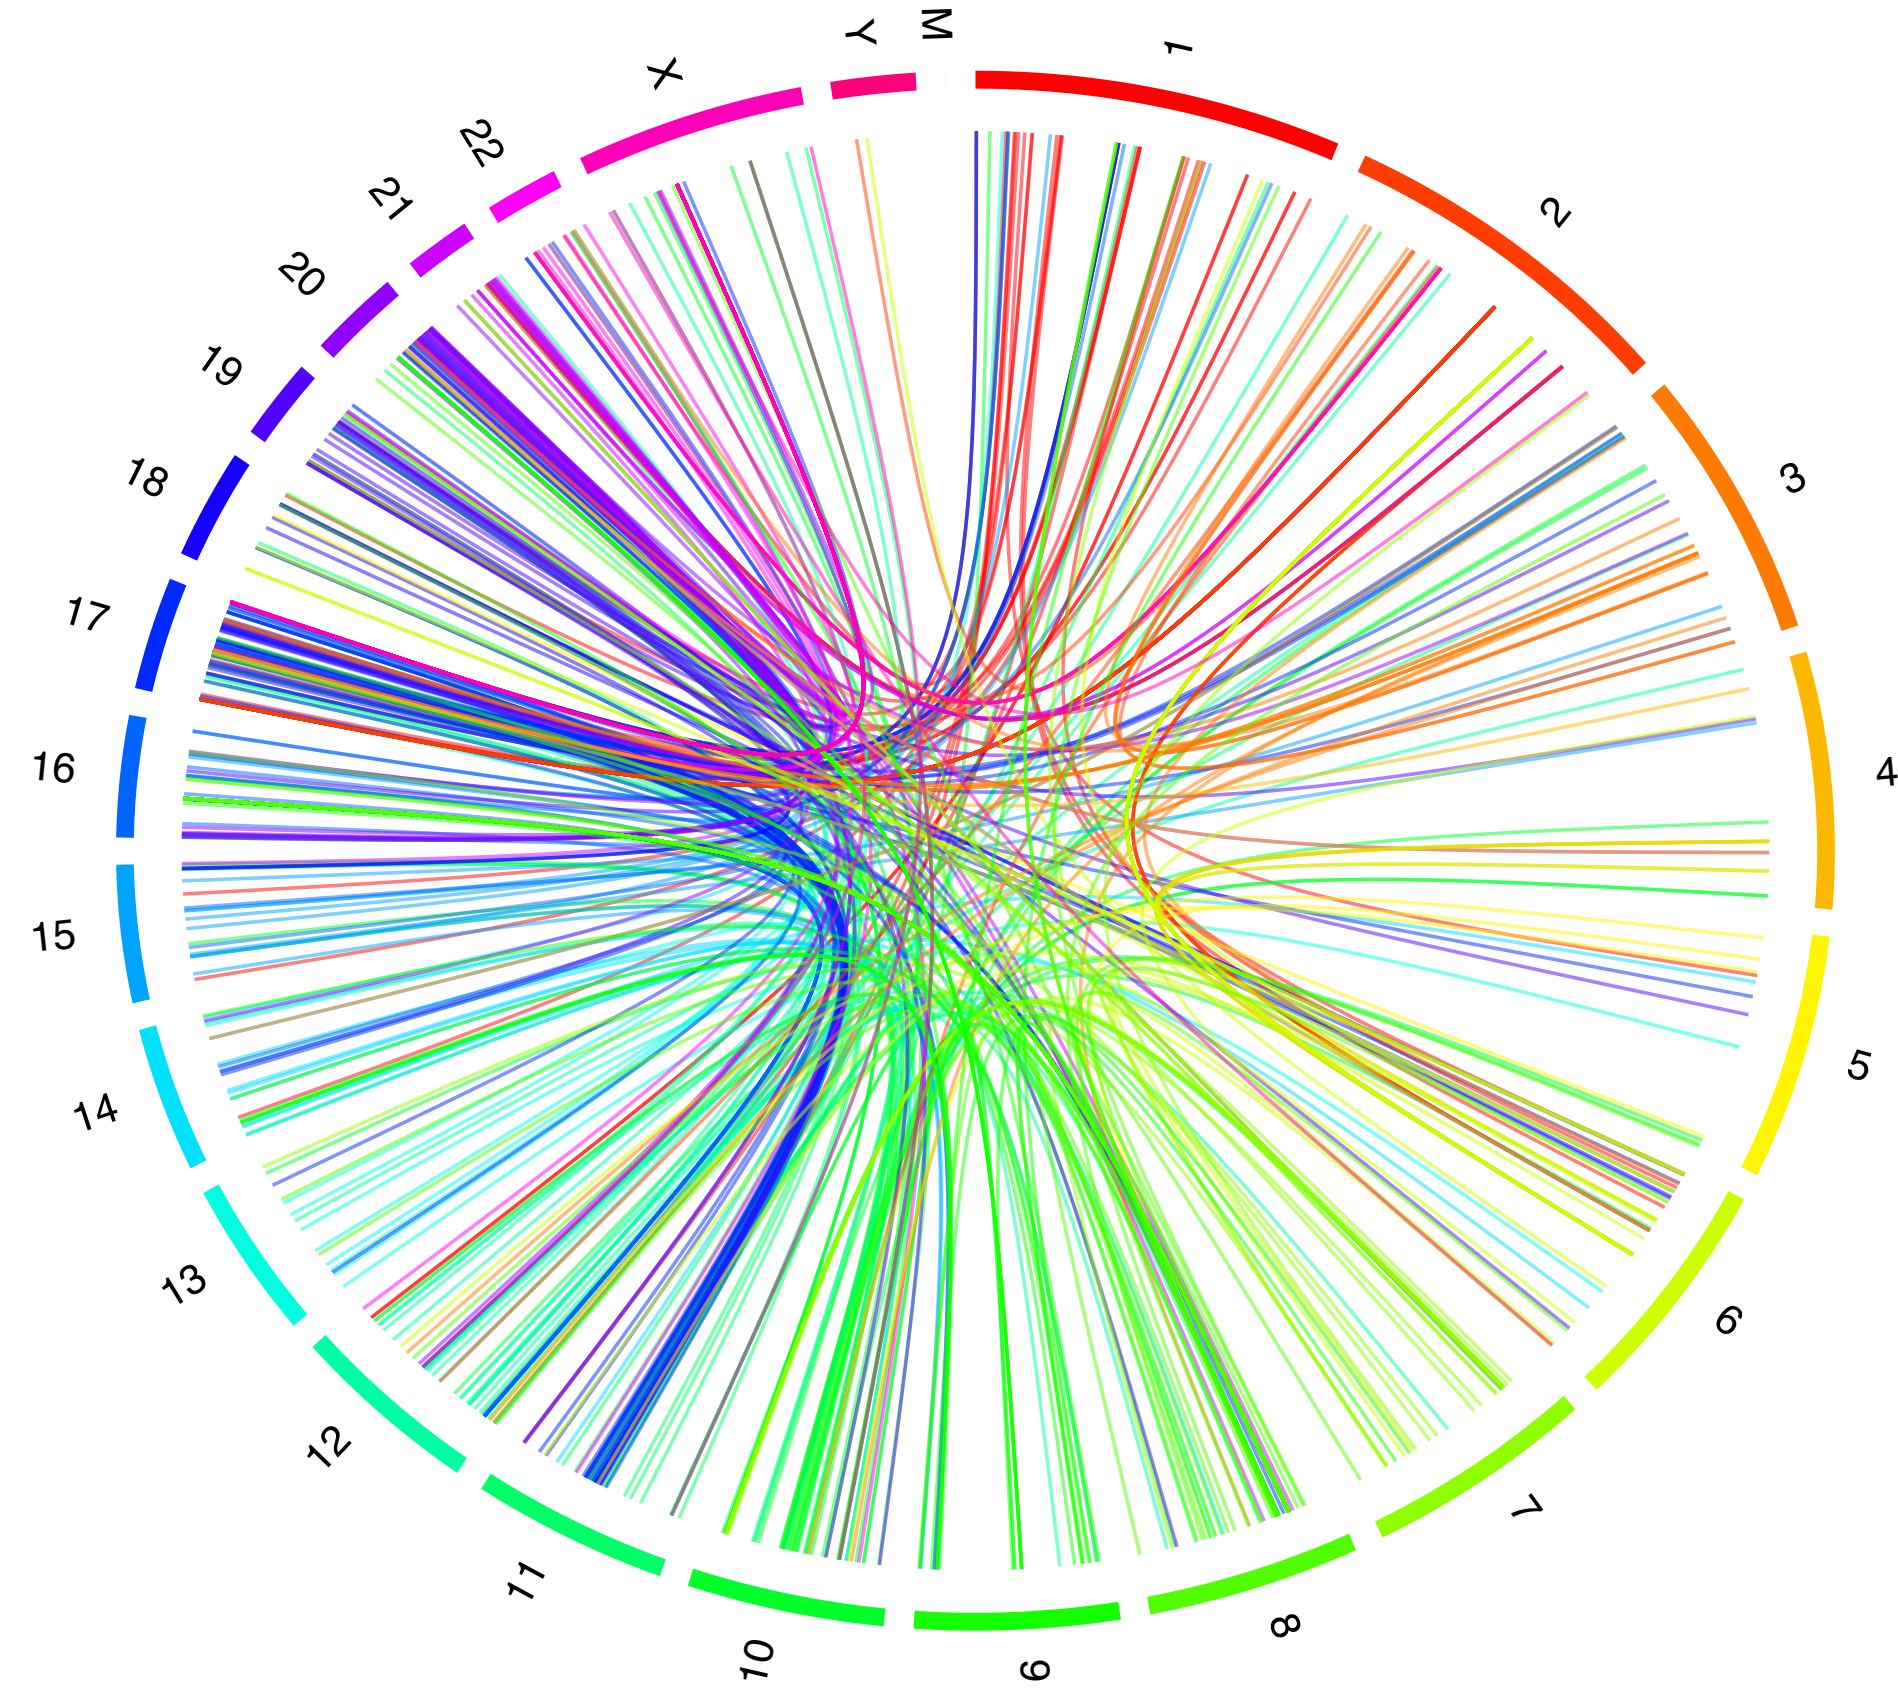**C.**

SK-BR-3

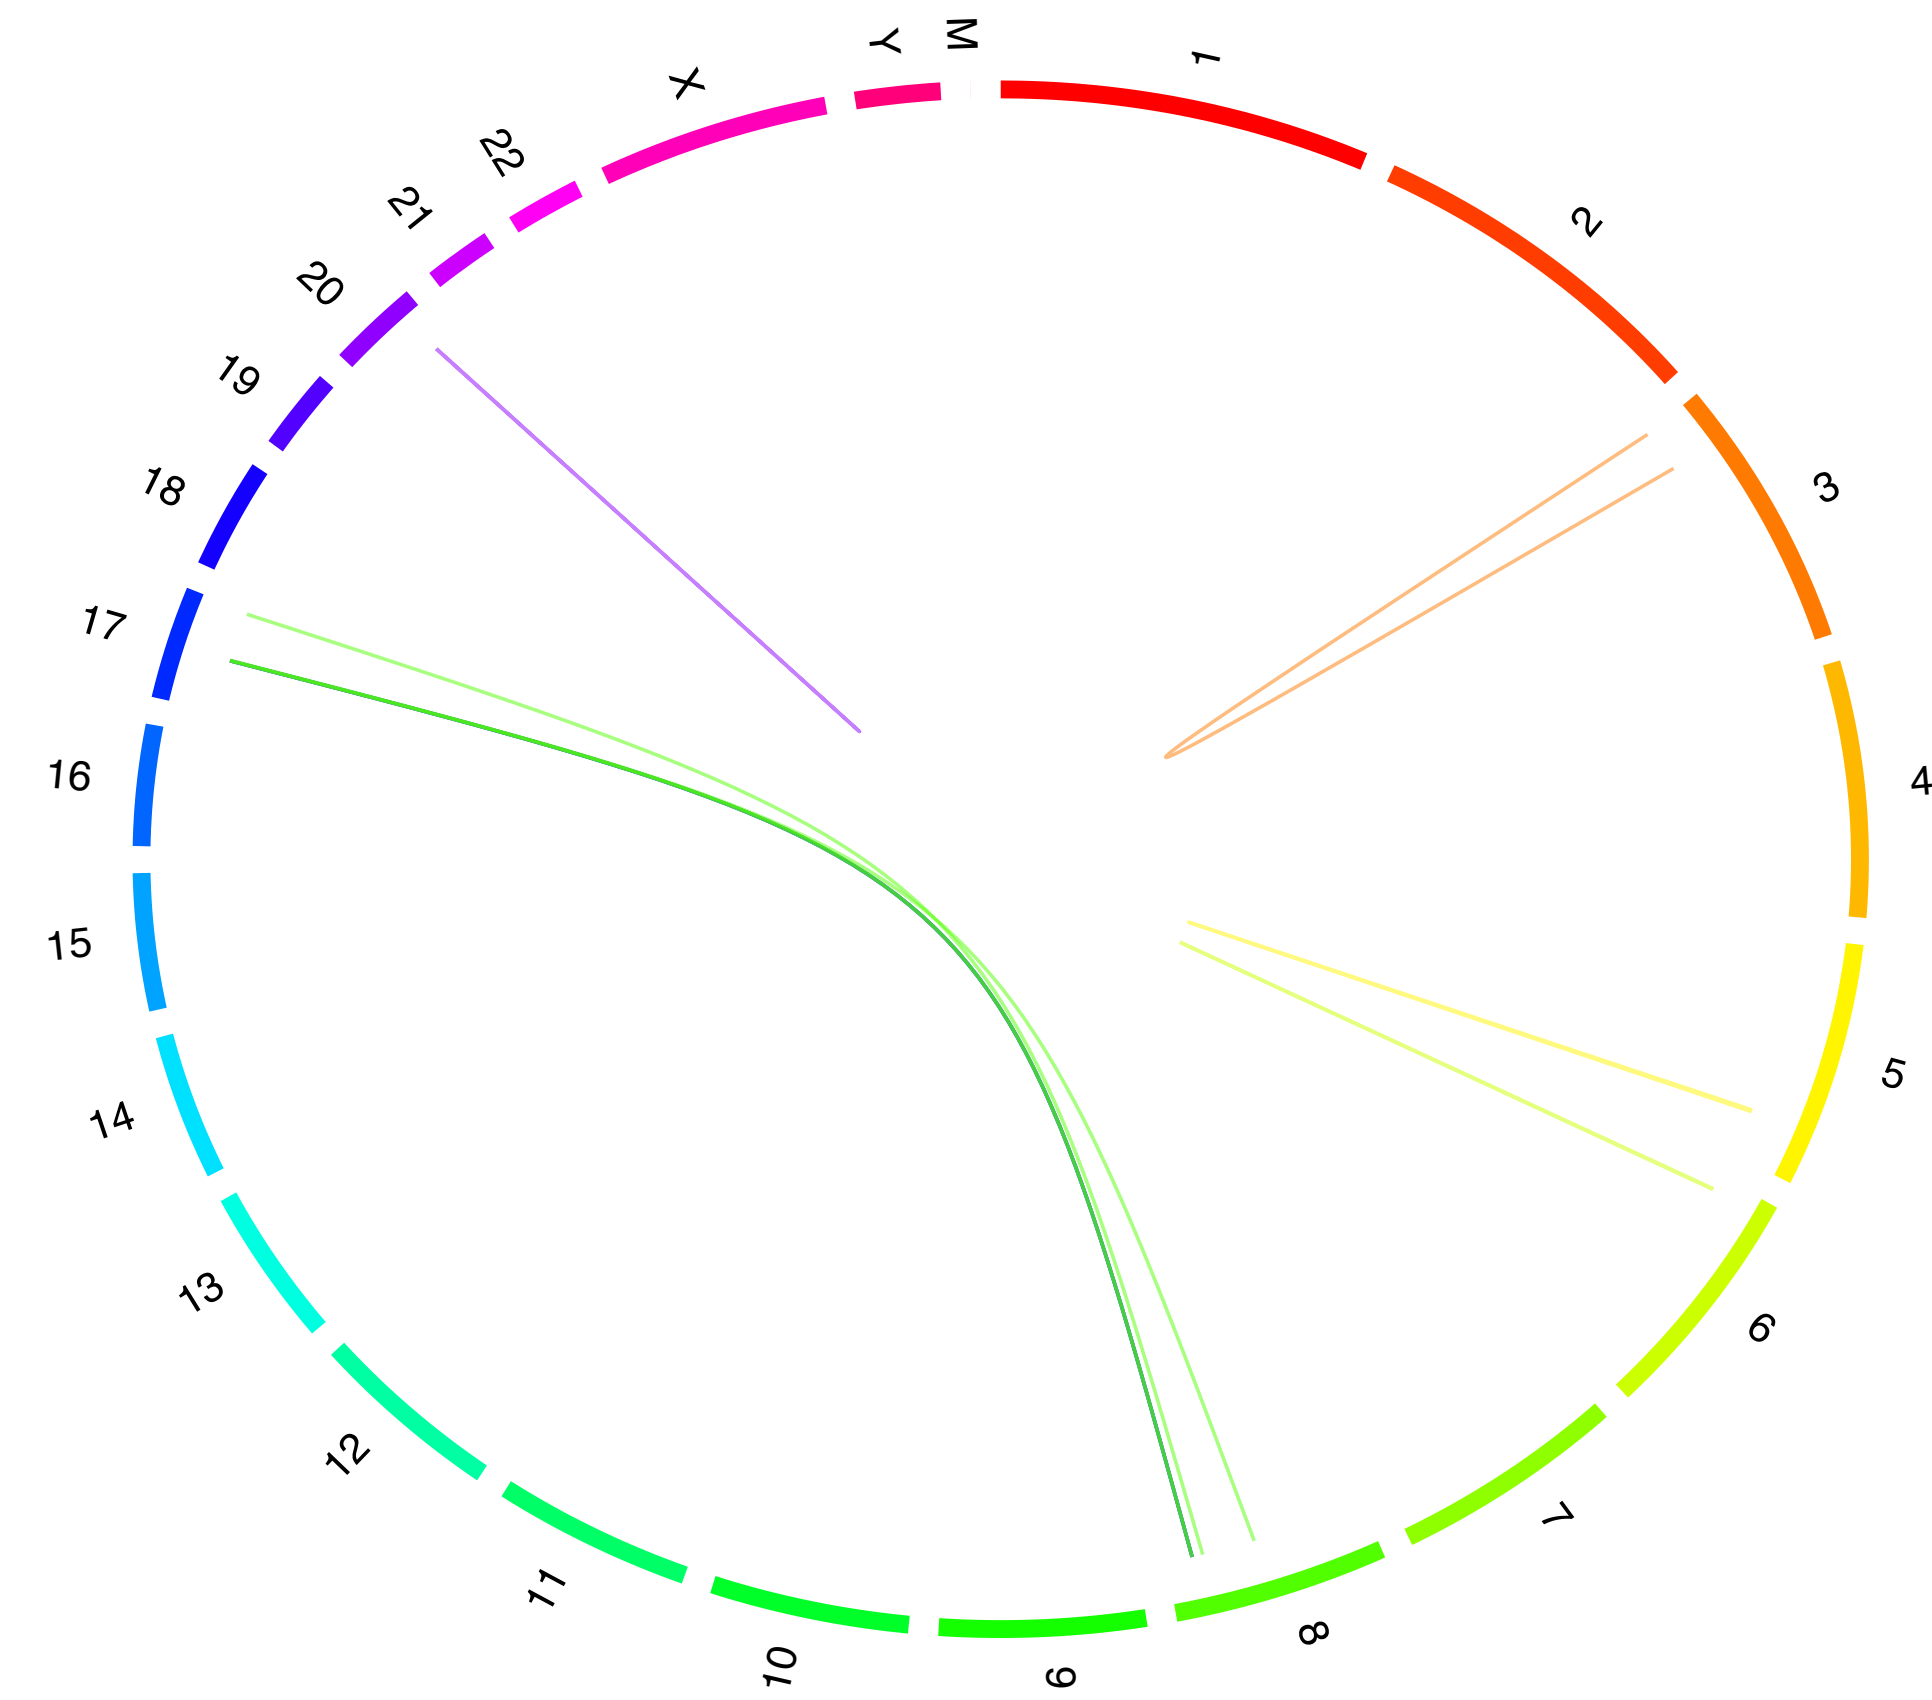

Supplement: bioinformatics_34_14_2364_s5.zip [file bioinformatics_34_14_2364_s5.zip]

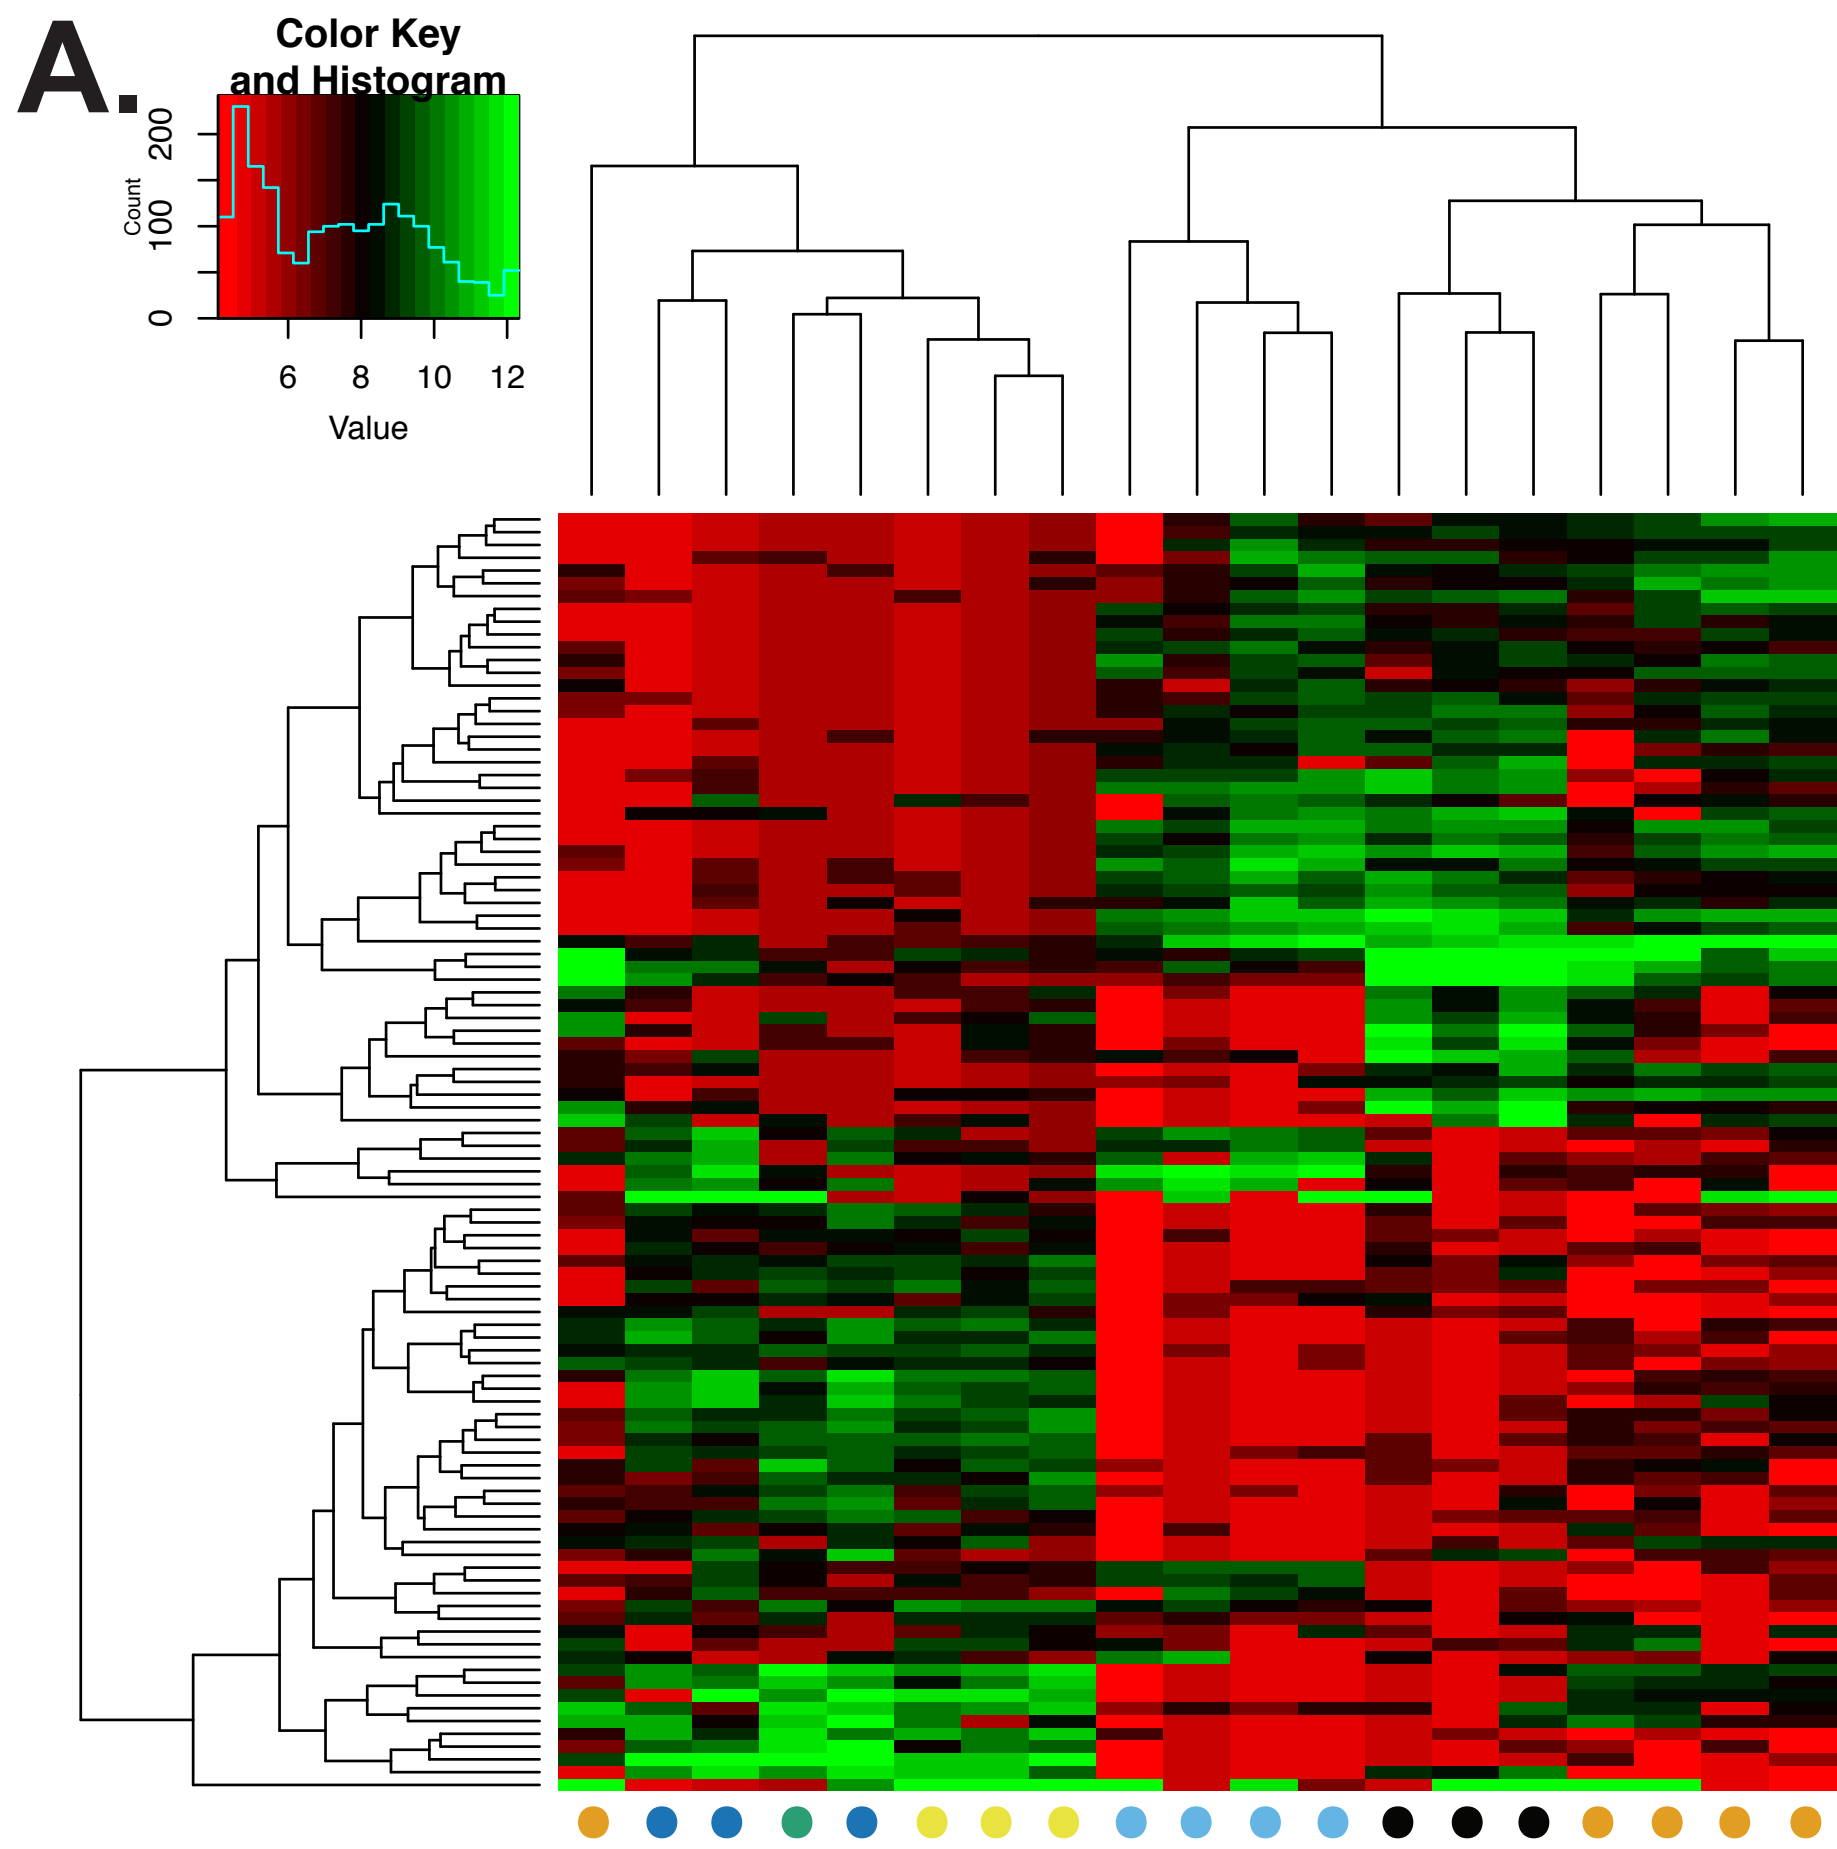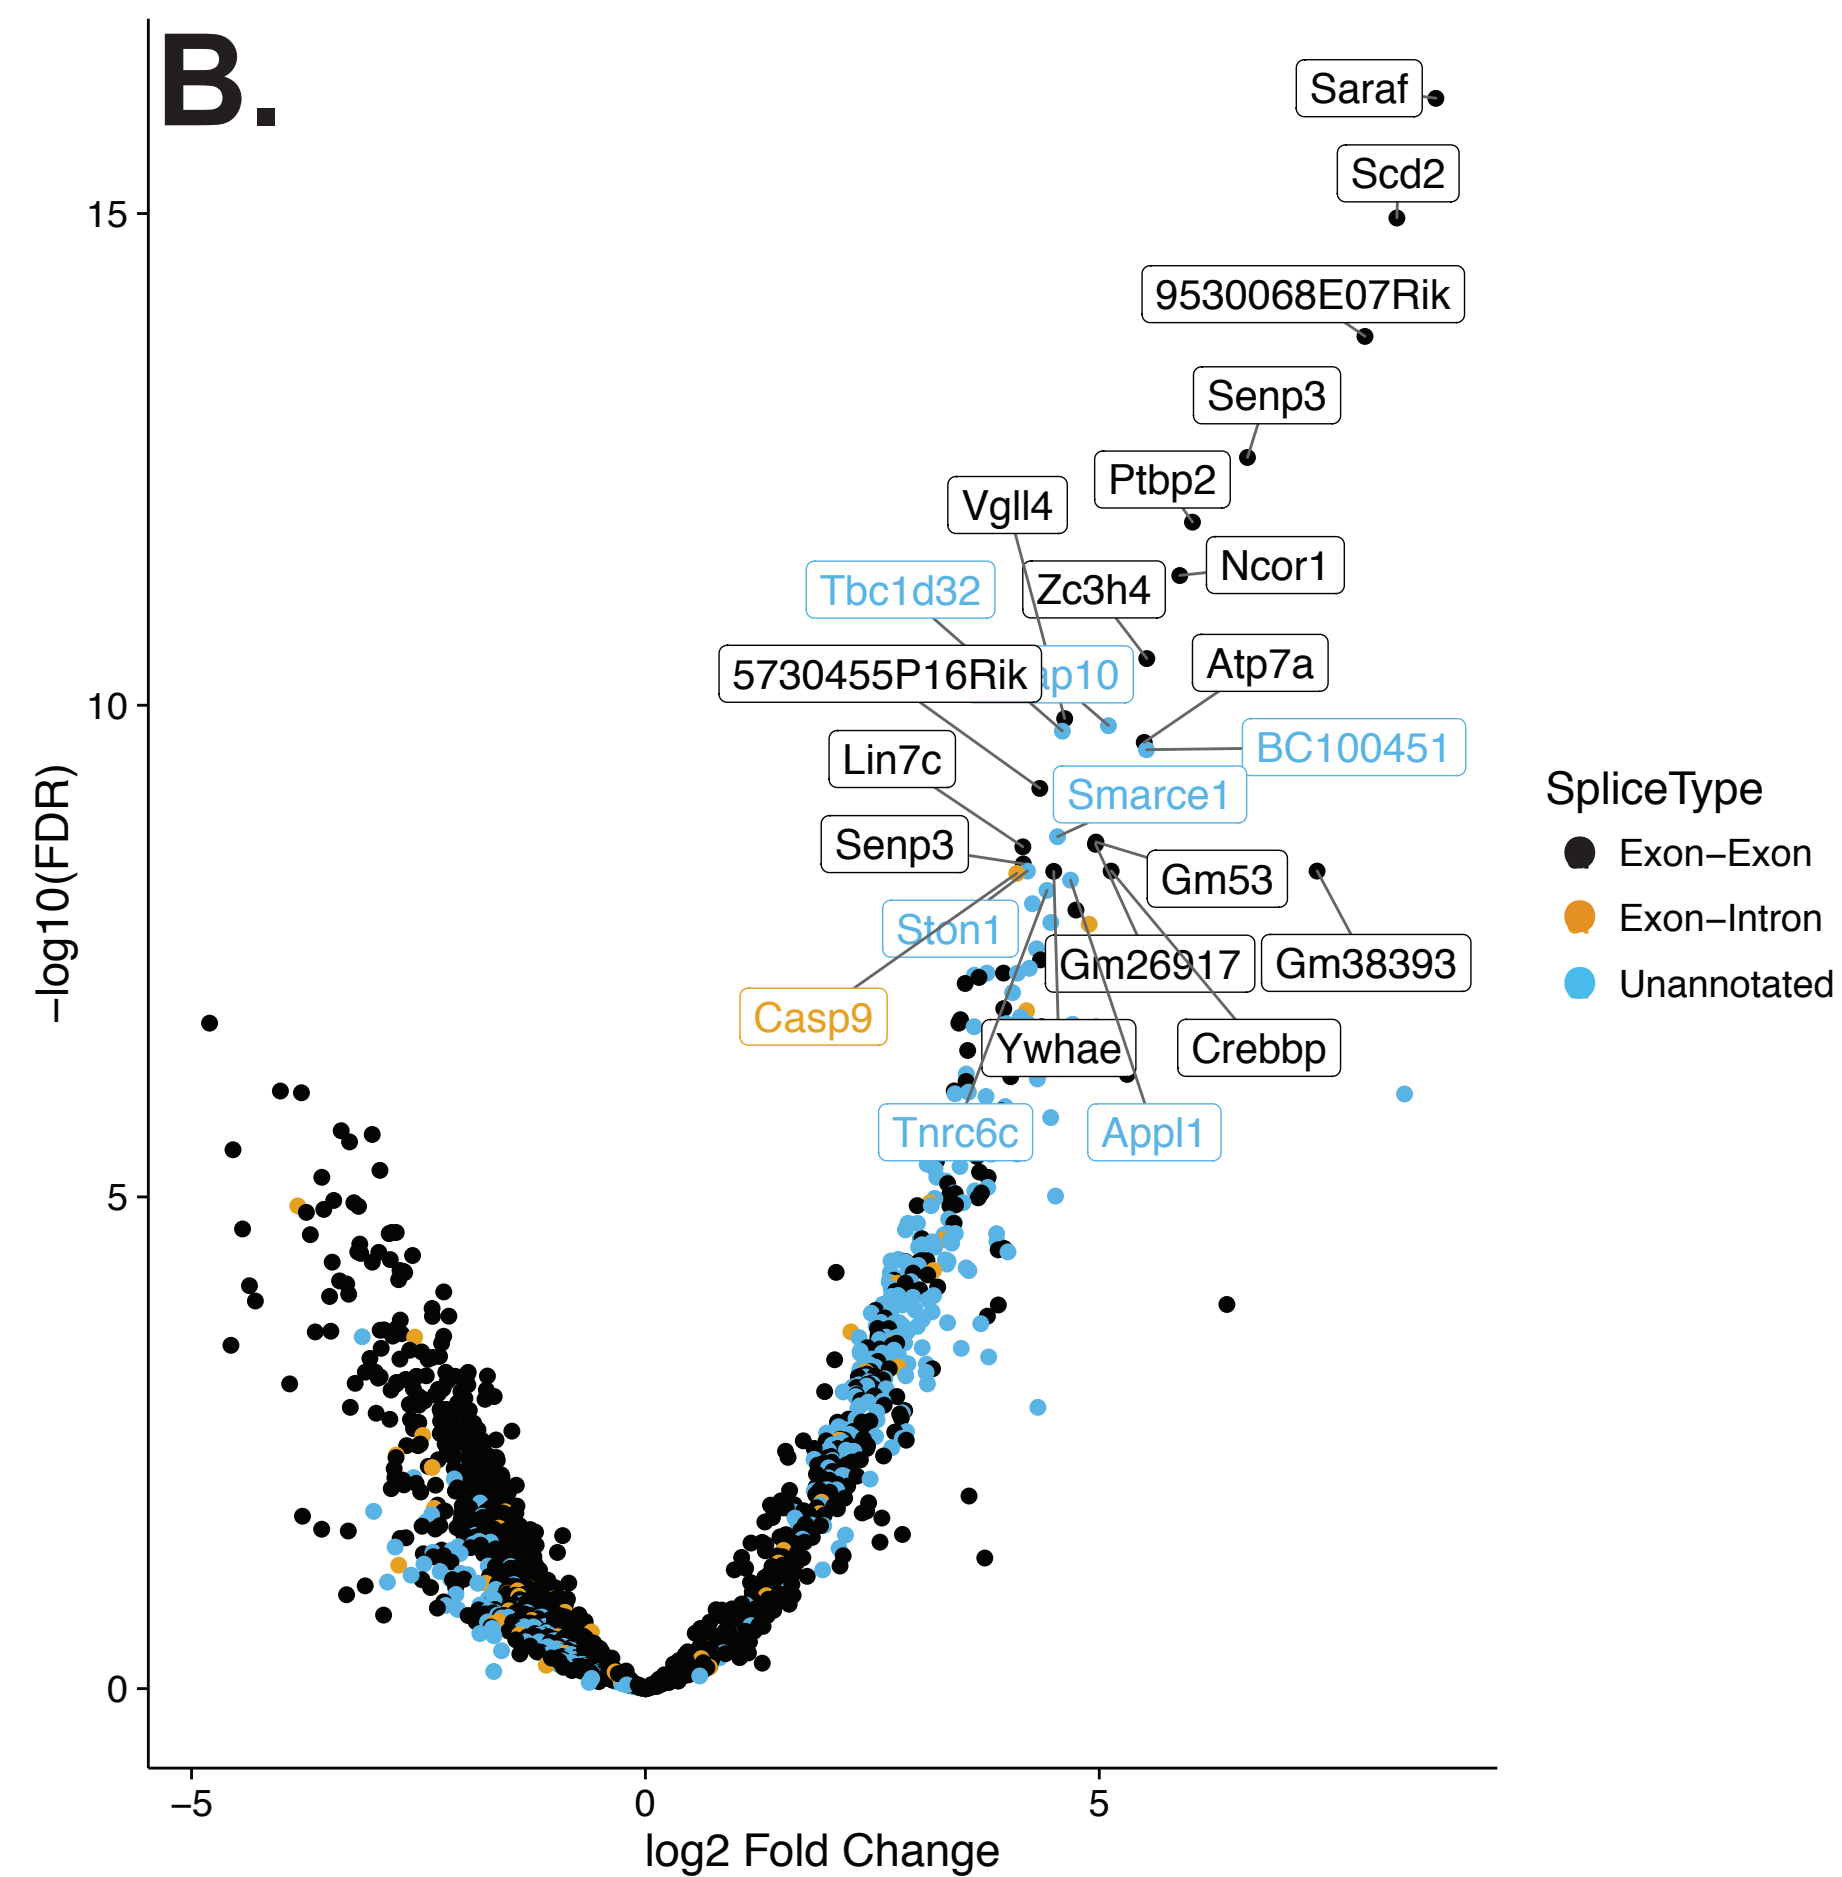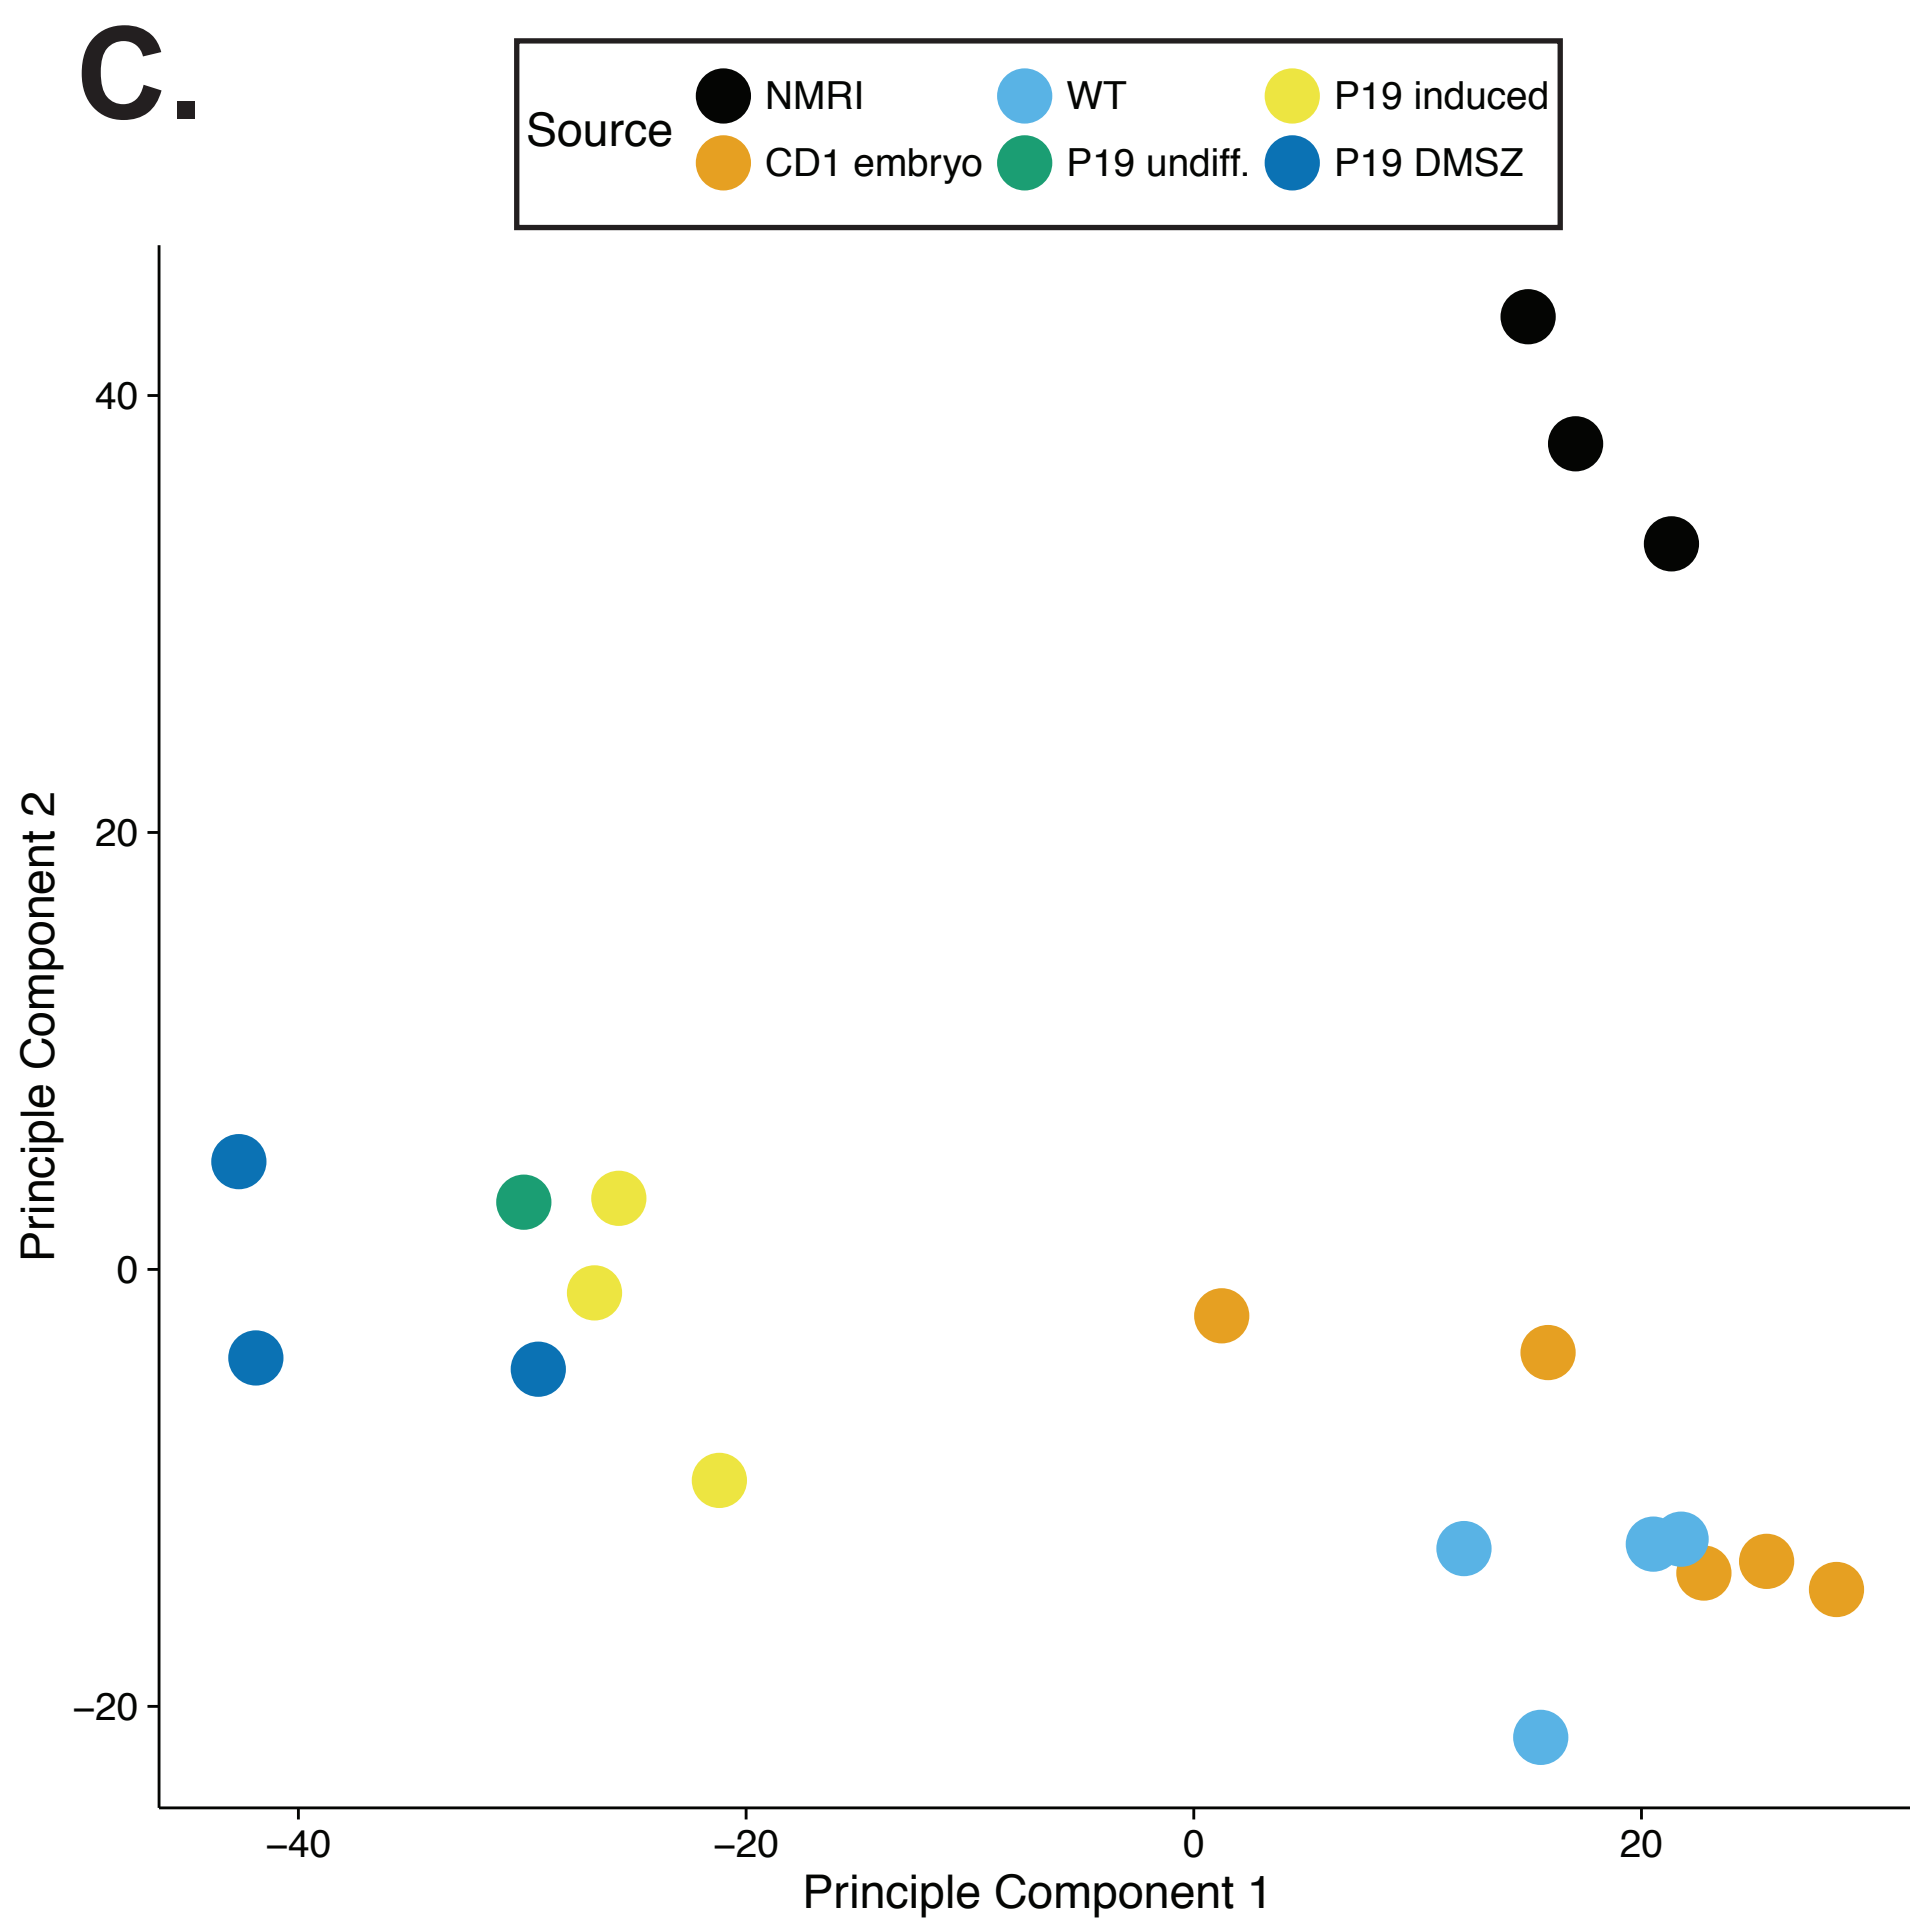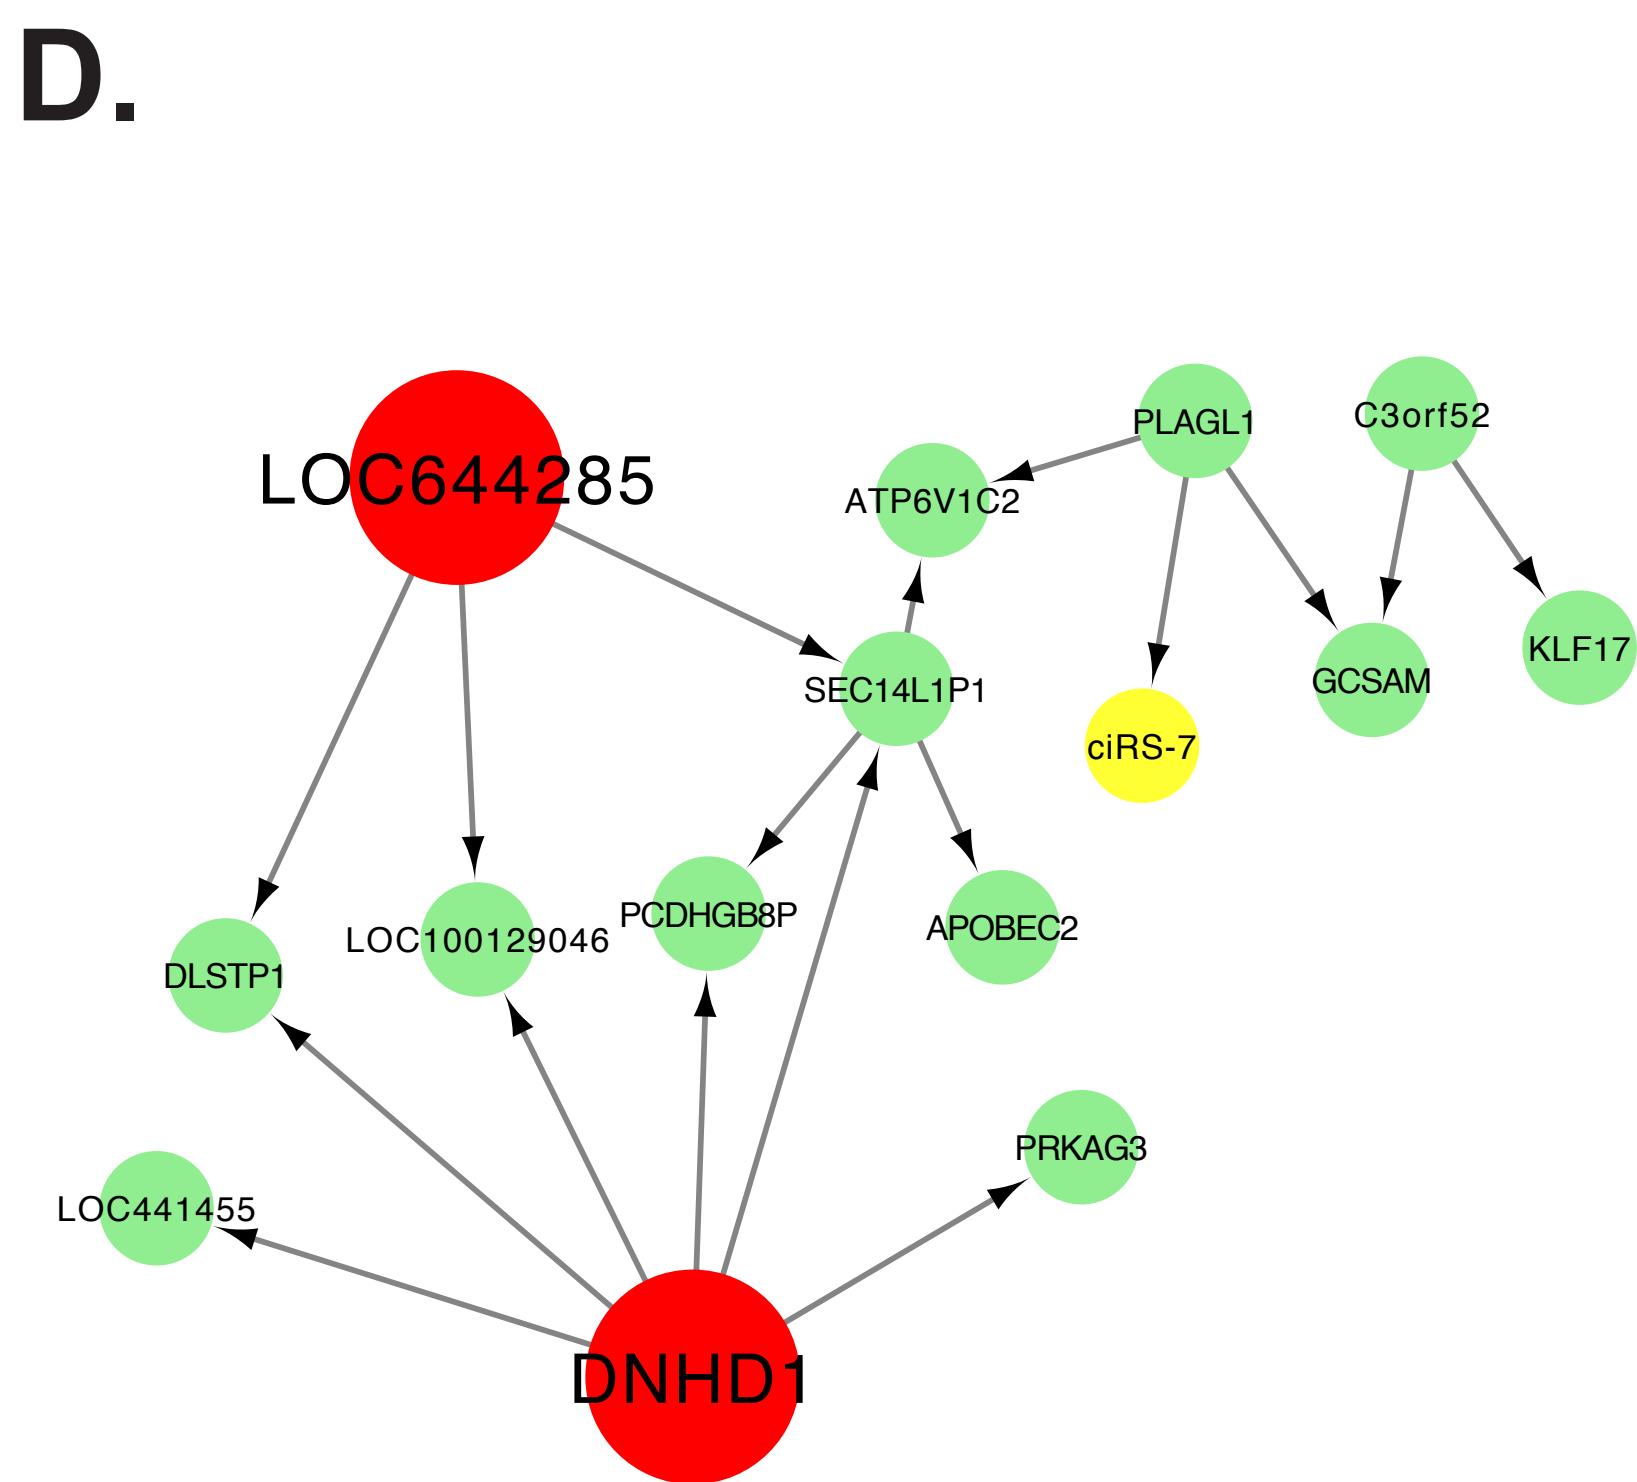

Supplement: bioinformatics_34_14_2364_s5.zip [file bioinformatics_34_14_2364_s5.zip]
